1 **Title Page**

2 **Perinatal maternal chronic exposure to dibutyl phthalate promotes visceral**  
3 **obesity in adult female offspring**

4 Kunyan Zhou <sup>123</sup>, Ran Cheng <sup>123</sup>, Meina Yang <sup>1</sup>, Xiaoyang Shen <sup>1</sup>, Xiaoyan Luo <sup>123</sup>, Li Ma <sup>14</sup>,  
5 Liangzhi Xu <sup>123</sup>, Jing Zhang<sup>\*123</sup>

6 <sup>1</sup> Department of Obstetrics and Gynecology, West China Second University Hospital,  
7 Chengdu, Sichuan, People's Republic of China

8 <sup>2</sup> Reproductive Endocrinology and Regulation Laboratory, West China Second University  
9 Hospital, Sichuan, People's Republic of China

10 <sup>3</sup> Key Laboratory of Birth Defects and Related Diseases of Women and Children (Sichuan  
11 University), Ministry of Education, China

12 <sup>4</sup> Surgery Department, West China Second University Hospital, Chengdu, Sichuan, People's  
13 Republic of China

14 **\*Corresponding author:**

15 Jing Zhang, Department of Obstetrics and Gynecology, West China Second University  
16 Hospital, Sichuan University, Chengdu 610041, Sichuan, China. Tel: 86-28-85502391, Fax:  
17 86-28-85559065, E-mail: [jingzhang110914@126.com](mailto:jingzhang110914@126.com)

18

19 **Acknowledgments**

20 The authors thank Professor Bin Zhou for sample preservation; Siyu Zhou and Sicong Li for  
21 sample collection.

22 This work was supported by the Scientific Research Projects of The National Natural Science  
23 Fund (21707096) in study design, data collection and analysis; by Technology Support  
24 Program of Sichuan Province (2019YFS0422) in data collection and analysis.

25

26

27

28 **Abstract**

29 *Introduction*

30 Maternal exposure to dibutyl phthalate (DBP) may result in glucolipid dysfunction in female  
31 offspring. However, the underlying mechanisms remain elusive. We hypothesized that  
32 chronic maternal DBP exposure could induce abnormal metabolism of glucolipid.

33 *Materials and methods*

34 Sprague-Dawley rats were intraperitoneally injected with different doses of DBP, estradiol,  
35 and corn oil from gestational day 7 until the end of lactation. The weights, visceral fat  
36 percentage, serum lipid, insulin and glucose, protein levels of PI3K signal pathway in muscle  
37 were detected in F1 female offspring.

38 *Results*

39 Although the birth weight of F1 female offspring was not different among groups, the weights  
40 were heavier in DBP groups from postnatal day 7 to adult ( $P < 0.001$ ). The visceral adipose  
41 percentage in adult female offspring was increased by perinatal exposure to DBP ( $P < 0.001$ ).  
42 Decreased serum levels of triglyceride ( $P < 0.0001$ ), fasting glucose ( $P = 0.004$ ), prolactin  
43 ( $P = 0.006$ ), HOMA-IR ( $P = 0.014$ ) were found in female offspring exposed to DBP, but no  
44 difference for fasting insulin, total cholesterol, adiponectin. Increased protein levels of  
45 p-AKT, but decreased PTEN and GPR30 were observed in muscle of female offspring in  
46 DBP group, but without significant difference. None difference was observed for the protein  
47 levels of PI3K, AKT, GLUT4, InsR and IRS-1.

48 *Conclusion*

49 Maternal perinatal exposure to DBP induced obesity and accumulation of visceral adipose  
50 tissue for the adult female offspring. Serum glucolipid and local signal transduction of  
51 PTEN/PI3K/AKT pathway in muscle were not adversely affected by perinatal exposure to  
52 DBP for adult female offspring.

53

54 **Keywords**

55 dibutyl phthalate; DBP; obesity; visceral fat; glucolipid metabolism; PI3K; PTEN

56

57

58 **Introduction**

59 Endocrine-disrupting chemicals (EDCs) are exogenous compounds which can alter hormone  
60 biosynthesis, causing adverse effects to human health and their offspring  
61 (Diamanti-Kandarakis et al., 2009). Phthalate esters is a kind of EDCs, commonly used in  
62 products such as plastics, medical equipment, personal care products, and in the coating of  
63 some oral medications. Phthalate metabolites have been detected in various body fluids  
64 including blood, urine, and follicular fluid (Du et al., 2016). Multigenerational and  
65 transgenerational effects on female health are induced by prenatal exposure to the phthalate  
66 mixture, such as metabolic syndrome (Manikkam et al., 2013). However, the long-term  
67 metabolic impacts of early-life phthalate and phthalate mixture exposures are controversial.  
68 Furthermore, the metabolic impacts of phthalate exposures have focused on diethylhexyl  
69 phthalate (DEHP) (Neier et al., 2019).  
70 Dibutyl phthalate (DBP) is also a widely used plasticizer, is rapidly absorbed, distributed, and  
71 metabolized to mono-butyl-phthalate (Rodriguez-Sosa et al., 2014). DBP has been studied  
72 intensively on the reproductive toxicology in male development before. Interestingly, women  
73 of reproductive age have the highest exposure levels of mono-butyl-phthalate than any other  
74 age/sex group (Blount et al., 2000; Guo et al., 2011). The estimated daily intake in humans is  
75 7-10 $\mu$ g/kg/day in the general population and 233 $\mu$ g/kg/day in patients taking DBP-coated  
76 medications (Hines et al., 2011). DBP metabolites can reach the ovary and have been  
77 measured in the follicular fluid of women (Du et al., 2016).  
78 Obesity is associated with the development of insulin resistance, which in turn plays an  
79 important role in the obesity-associated cardiometabolic complications (Barazzoni et al.,  
80 2018). Recent systematic review suggested that insulin resistance was positively associated  
81 with DBP exposure, however, the association of obesity and phthalate exposure was unclear  
82 (Radke et al., 2019). The PTEN/PI3K/Akt signaling cascades have effect on glucose uptake  
83 via translocation of GLUT-4 (Li et al., 2017). This signal pathway can also play a role on the  
84 efficacy of EDCs on female (Hu et al., 2018).  
85 Perinatal maternal exposure to DBP has been reported to influence the health of female  
86 offspring, but the results were controversial. Furthermore, the underlying molecular  
87 mechanisms of metabolic dysfunction induced by perinatal maternal exposure to DBP have

88 not been clearly elucidated to date. In this study, we aimed to study the effects of perinatal  
89 DBP exposure on glucolipid metabolism in female offspring and examine the role of  
90 PTEN/PI3K/AKT signaling pathway.

91

## 92 **Material and methods**

### 93 *Animals and tissue sample*

94 All experiments were conducted according to the Guide for the Care and Use of Laboratory  
95 Animals of National Research Council and approved by the Ethical Scientific Committee for  
96 the Care of Animals at West China Second University Hospital, Sichuan University (No.  
97 2018-007).

98 Adult female and male Sprague-Dawley rats were purchased and allowed to acclimate to the  
99 facility for two weeks before use. The rats were maintained in polysulfone cages at Animal  
100 Facility of West China Second University Hospital, Sichuan University, under controlled  
101 conditions ( $22 \pm 1^\circ\text{C}$ , 12h light/dark cycle). Food and water were provided for ad libitum  
102 consumption. Groups of two females were mated with one male overnight and the day of the  
103 vaginal plug was considered day 0 of gestation. Pregnant females were housed individually  
104 with hard wood shavings as bedding and randomly allocated into five groups using a random  
105 number table.

106 Pregnant rats were treated intraperitoneally (i.p.) with DBP (99.5% pure, solid, Sigma  
107 Chemical Co., St. Louis, MO, USA) in corn oil (Sigma, 8001-30-7) at the doses of 33  
108 mg/kg/day, 66 mg/kg/day, 132 mg/kg/day from gestational day 7 (GD7) throughout post-natal  
109 day 21 (PND 21); with estradiol ( $\text{E}_2$ , 20  $\mu\text{g}/\text{kg}/\text{day}$ ) or corn oil (negative group, 0.3 ml/day) as  
110 controls. The administration dosage and route of DBP was chosen based on the previous  
111 study describing transgenerational inheritance of reproductive disease with perinatal exposure  
112 to DBP (Manikkam et al., 2013). Reproductive disorder has also been proved by our  
113 unpublished preliminary study with the same administration method of DBP. The weights of  
114 gestational F0 rats were weighted every week during gestation and lactation (PND 21).  
115 At weaning, only female F1 offspring were selected and housed in five groups with three  
116 individuals per cage, including around 10 cages in each group. The weights of F1 offspring  
117 were weighted regularly up to adult age (PND 90). Then F1 females were anesthetized with

118 isoflurane and killed by carbon dioxide overdose. The muscles or white visceral fat tissue  
119 were collected, weighted and stored at  $-80^{\circ}\text{C}$  until use. The percentage of visceral fat tissue  
120 was calculated by dividing fat weight by body weight. Fasting blood samples were collected  
121 from the heart and separated by centrifugation at 3000 rpm for 15 min at  $4^{\circ}\text{C}$ . Serum samples  
122 were stored at  $\leq -80^{\circ}\text{C}$ . Total cholesterol (Tch), triglyceride (TG), fasting glucose were  
123 measured using biochemical detection kits (KHB, Shanghai, China) in automatic biochemical  
124 analyser (Hitachi 7600).

#### 125 *Enzyme-linked immunosorbent assay*

126 Levels of prolactin (PRL), fasting insulin (FINS), adiponectin (ADP) in the serum were  
127 measured in duplicate using enzyme-linked immunosorbent assay (ELISA) kits (Jiancheng  
128 Nanjing, China), according to the manufacturer's instructions. The detection limits were  
129 0.5-200 ng/ml, 1-300mIU/L, 0.1-30mg/L for prolactin, insulin and adiponectin, respectively.  
130 The ELISA kit intra-assay coefficient of variation and inter-assay coefficient of variation  
131 were  $< 10\%$  and  $< 12\%$ , respectively. Homeostatic Model Assessment of estimated Insulin  
132 Resistance (HOMA-IR) was calculated based on fasting glucose and FINS (So et al., 2020).

#### 133 *Western blot analysis*

134 Antibody against  $\beta$ -actin, insulin receptor (InsR), insulin receptor substrate-1 (IRS-1) and  
135 HRP-conjugated secondary antibodies were obtained from Zen-Bioscience Company  
136 (Chengdu, Sichuan, China); antibody against phosphatidylinositol 3-hydroxy kinase (PI3K),  
137 Phosphorylated protein kinase B (p-AKT), and glucose transporter 4 (GLUT4) from  
138 Proteintech Group Inc. (Wuhan, China); antibody against AKT, phosphatase and tensin  
139 homology deleted on chromosome 10 (PTEN), G protein coupled estrogen receptor 30  
140 (GPR30) were from abclonal Technology.

141 Muscle was lysed using RIPA Lysis Buffer (Beyotime Inst Biotech, Shanghai, China). The  
142 bicinchoninic acid (BCA) protein assay kit (Pierce, IL, USA) was used to determine the  
143 protein concentrations. 20-40  $\mu\text{g}$  of lysate protein was resolved by 10% SDS-PAGE. Proteins  
144 were transferred to 0.45  $\mu\text{M}$  polyvinylidene fluoride (PVDF) membranes after electrophoresis.  
145 The membranes were incubated with 5% nonfat milk for 90 min at  $37^{\circ}\text{C}$ , then washed with  
146 TBST and incubated at  $37^{\circ}\text{C}$  with primary antibodies for 2 hours. After a thorough wash with  
147 TBST and incubation with respective HRP-conjugated secondary antibodies at  $37^{\circ}\text{C}$  for 1

148 hour, the membranes were incubated for 2-5min in enhanced chemiluminescence reagent  
149 (Bio-Rad) and were then exposed to film for signal detection. The optical density of target  
150 protein was corrected using  $\beta$ -actin and analyzed with Image J.

#### 151 *Statistical analysis*

152 All data were presented as the mean and standard deviation (SD). Analysis of variance  
153 (One-way) was used to conduct multiple comparisons between groups and was then followed  
154 by Bonferroni post hoc comparisons if equal variances were assumed or Dunnett's T3 post  
155 hoc comparisons if equal variances were not assumed. Statistical analyses were performed  
156 using SPSS v.20 software (IBM, Inc.). A P-value < 0.05 was statistically significant.

157

## 158 **Results**

### 159 *The weights change of F0 and F1 rats*

160 The basal weights of F0 pregnant rats were not different among groups at the stage of GD0  
161 and GD7. However, after the DBP was injected, the gain weight of F0 rats was fewer in DBP  
162 group than that of control group from GD14 to PND21 ( $P < 0.001$ ), especially in the medium  
163 and high DBP groups (Table 1).

164 The birth weights of F1 female rats in DBP groups were not different from that of control  
165 ( $P > 0.05$ ). However, the weights began growing heavier in DBP groups than that of control  
166 from PND 7 until adult (PND90), especially heavier in the high dosage group of DBP (Table  
167 2).

### 168 *The glycolipid metabolism of F1 female offspring*

169 The visceral adipose tissue was much heavier in DBP group than that of control with the  
170 growing up of offspring. The percentage of visceral fat was much higher in DBP group for  
171 adult female offspring, especially in the medium and high DBP groups (Table 3). Being  
172 consistent with the effects of  $E_2$ , the serum levels of TG ( $P < 0.0001$ ), fasting glucose ( $P = 0.004$ ),  
173 PRL ( $P = 0.006$ ), HOMA-IR ( $P = 0.014$ ) in F1 female offspring were decreased after perinatal  
174 exposure to DBP (Fig 1). However, the levels of FINS, Tch, ADP were not different among  
175 groups.

### 176 *The levels of proteins in glucolipid metabolism expressed in muscle*

177 Increased p-AKT, but decreased PTEN and GPR30 were observed in muscle tissue of female

178 offspring exposed to DBP, but without significant difference (Fig 2, Fig 3). However, the  
179 protein levels of PI3K, AKT, GLUT4, InsR, IRS-1 were not different among control and DBP  
180 groups. The protein levels of GLUT4, PTEN (p=0.029) and GPR30 (P=0.006) were  
181 significantly increased by E<sub>2</sub>.

182

### 183 **Discussion**

184 In present study, the glucolipid metabolism and the underlying molecular mechanisms  
185 induced by the perinatal maternal exposure to DBP were explored. Decreased weight gain of  
186 F0 rats, but increased weight and visceral adipose accumulation of adult female offspring  
187 were found. Serum glucolipid metabolism and local signal transduction of PTEN/PI3K/AKT  
188 pathway in muscle tissue were not adversely affected by perinatal exposure to DBP for adult  
189 female offspring.

190 The mechanism and various phthalate effects on human glucose metabolism remain largely  
191 unknown. The metabolic impacts of developmental phthalate exposures have been focused on  
192 DEHP and found that females perinatally exposed to DEHP only had increased body fat  
193 percentage and decreased lean mass percentage, whereas females perinatally exposed to  
194 diisononyl phthalate (DINP) only had impaired glucose tolerance (Neier et al., 2019). The  
195 metabolic impact of phthalate is discrepant among different components; the impact of  
196 phthalate mixtures is also different from that of single phthalate. The efficacy of DBP might  
197 be different from those of DEHP or DINP.

198 In present study, heavier adult weight, and higher percentage of visceral fat tissue were found  
199 in adult female offspring perinatally exposed to DBP. Decreased serum levels of triglyceride,  
200 fasting glucose, prolactin, HOMA-IR were also found in female offspring, but no difference  
201 for fasting insulin, total cholesterol, and adiponectin.

202 Being consistent with the results of present study, intrauterine exposure to low-dose DBP (5  
203 mg/kg/day) from GD 12 until PND 7 also promoted obesity in adult female and male  
204 offspring, but with evidence of glucose and lipid metabolic disorders and a decreased  
205 metabolic rate (Li et al., 2020). Xiong et al. (2020) also found the body weight of mice was  
206 increased after exposure to both low and high doses of DBP (0.1 and 1 mg/kg) by oral  
207 gavage. However, the serum levels of hepatic triglyceride and total cholesterol were increased

208 in this study. Moreover, disturbed homeostasis of gut microbiota, hepatic lipid metabolism  
209 disorder, liver inflammation were also found in mice exposure to DBP. Consistently,  
210 sub-chronic exposure to low concentration of DBP increased body weight gain, feed  
211 efficiency, abdominal to thoracic circumference ratio, and body mass index in rats.  
212 Meanwhile, serum cholesterol decreased, glucose increased with DBP treatments (Majeed et  
213 al., 2017). However, exposure to 50 mg/kg/day DBP alone induced a marked decrease in  
214 insulin secretion and glucose intolerance, but had no influence on insulin resistance (Deng et  
215 al., 2018).

216 From the results of above studies, the weight was identified to be increased when exposed to  
217 DBP. However, the effects of DBP exposure on lipid and glucose metabolism was  
218 controversial. The result discrepancy among the studies might be induced by the different  
219 administration route, duration, period, and dosage of DBP. The transgenerational effects of  
220 DBP on F1 offspring might be different from that of F0 generation. The function of liver and  
221 gut might be severely disturbed by the oral route, which could furtherly adversely affect the  
222 glucolipid metabolism.

223 The effective mechanism of DBP on glucolipid metabolism remain largely unknown.  
224 Fundamental research suggests that DBP contamination accelerate glucose consumption and  
225 upregulate the expression of porins and periplasmic monosaccharide ATP-binding cassette  
226 transporter solute-binding proteins for the metabolism of sugars in microbes (Chen et al.,  
227 2020). DBP-containing food or feeding adults DBP food affects the expression of  
228 homologous genes involved in xenobiotic and lipid metabolism (Williams et al., 2016). In  
229 present animal study in vivo, increased protein of p-AKT, decreased PTEN and GPR30 were  
230 observed in muscle of female offspring in DBP group, but without significant difference.  
231 None difference was observed for the protein levels of PI3K, AKT, GLUT4, InsR and IRS-1  
232 by us.

233 Cell experiments in vitro suggest the combined effect of DEHP and DBP promotes a  
234 ROS-mediated PI3K/Akt/Bcl-2 pathway-induced pancreatic  $\beta$  cell apoptosis that is  
235 significantly higher than the effects of each PAE (Li et al., 2021). Wang et al. found that the  
236 expression of PTEN protein was higher, while the expression of p-PI3K1, p-AKT, p70S6K  
237 and 4E-BP1 protein in the PI3K/AKT/mTOR signal pathway were significantly decreased in



238 DBP-induced apoptosis of testicular Sertoli cells in rats (Wang et al., 2017).  
239 Risk assessment case study indicate that DBP-induced downregulation of genes in the  
240 lipid/sterol/cholesterol transport pathway as well as effects on immediate early  
241 gene/growth/differentiation, transcription, peroxisome proliferator-activated receptor (PPAR)  
242 signaling and apoptosis pathways in the testis (Euling et al., 2013). Perinatal phthalate  
243 exposures are associated with short- and long-term activation of PPAR target genes in liver  
244 tissue, which manifested as increased fatty acid production in early postnatal life and  
245 increased fatty acid oxidation in adulthood (Neier et al., 2020). Intrauterine exposure of mice  
246 to low-dose DBP (5 mg/kg/day) appears to promote obesity in offspring by inhibiting UCP1  
247 via endoplasmic reticulum stress (higher expression of Bip and Chop), a process that is  
248 largely reversed by treatment with TUDCA (Li et al., 2020). DBP aggravate type 2 diabetes  
249 by disrupting the insulin signaling pathway and impairing insulin secretion. DBP exposure  
250 could disrupt the PI3K expression and AKT phosphorylation, and decrease the level of  
251 GLUT-2 in the pancreas tissue (Deng et al., 2018).  
252 Mechanistic studies have characterized the mode of action for DBP in the glucolipid  
253 metabolism using muscle, liver, pancreas, testis and adipose tissue. The discrepancy among  
254 the above results may be attributed to the type of experiment (in vivo vs. in vitro), route of  
255 DBP administration (orally, intraperitoneally, vs. addition to the medium), dosage of DBP  
256 (low or high), duration of exposure (acute or chronic; single or complex), different tissues  
257 (liver, muscle, pancreas, testis or adipose tissue).  
258 The strength of present study is to explore the long-term metabolic consequence of perinatal  
259 chronic maternal exposure to DBP for the adult female offspring, to explore the  
260 environmental deleterious effects on developmental origins of adult metabolic dysfunction.  
261 The limitation of present study is that the administration route (i.p.) of DBP is not the  
262 common environmental exposure mode (oral or skin exposure). Furthermore, given the  
263 widespread exposure of humans to numerous contaminants, the combinatorial effects of  
264 multiple chemicals also merit evaluation.

265

## 266 **Conclusion**

267 Maternal perinatal exposure to DBP could induce visceral obesity for the adult female

268 offspring. Serum glucolipid and local signal transduction of PTEN/PI3K/AKT pathway in  
269 muscle are not adversely affected by perinatal exposure to DBP for adult female offspring.  
270

## 271 **Declarations**

### 272 *Ethics approval and consent to participate*

273 All experiments were conducted according to the Guide for the Care and Use of Laboratory  
274 Animals of National Research Council and approved by the Ethical Scientific Committee for  
275 the Care of Animals at West China Second University Hospital, Sichuan University (No.  
276 2018-007).

### 277 *Consent for publication*

278 Not applicable

### 279 *Availability of data and materials*

280 The data and materials could be available by contacting the corresponding author upon  
281 reasonable request.

### 282 *Competing interests*

283 The authors declare that they have no known competing financial interests or personal  
284 relationships that could have appeared to influence the work reported in this paper.

### 285 *Funding*

286 This work was supported by the Scientific Research Projects of The National Natural Science  
287 Fund (21707096) in study design, data collection and analysis; by Technology Support  
288 Program of Sichuan Province (2019YFS0422) in data collection and analysis.

### 289 *Authors' contributions*

290 ZJ: Conceptualization, writing original draft, investigation, data curation and analysis, project  
291 administration, funding acquisition. CR: Investigation, Data curation and analysis. YM, SX,  
292 LX, ML: Investigation, validation. XL: Resources, supervision. ZK: Conceptualization,  
293 methodology, validation, funding acquisition. All authors read and approved the final  
294 manuscript

### 295 *Acknowledgements*

296 The authors thank Professor Bin Zhou for sample preservation; Siyu Zhou and Sicong Li for  
297 sample collection.

298

299 **References**

- 300 Barazzoni R, Gortan Cappellari G, Ragni M, Nisoli E. (2018) Insulin resistance in obesity: an  
301 overview of fundamental alterations. *Eat Weight Disord*; 23 :149-157.
- 302 Blount B, Silva M, Caudill SP, et al. (2000) Levels of seven urinary phthalate metabolites in a  
303 human reference population. *Environ Health Perspect* 108:979-982
- 304 Chen W, Wang Z, Xu W, Tian R, Zeng J. (2020) Dibutyl phthalate contamination accelerates  
305 the uptake and metabolism of sugars by microbes in black soil. *Environ Pollut* 262:114332.
- 306 Deng T, Zhang Y, Wu Y, et al. (2018) Dibutyl phthalate exposure aggravates type 2 diabetes  
307 by disrupting the insulin-mediated PI3K/AKT signaling pathway. *Toxicol Lett* 290:1-9.
- 308 Diamanti-Kandarakis E, Bourguignon JP, Giudice LC, et al. (2009) Endocrine-disrupting  
309 chemicals: an Endocrine Society scientific statement. *Endocr Rev* 30: 293-342.
- 310 Du YY, Fang YL, Wang YX, et al. (2016) Follicular fluid and urinary concentrations of  
311 phthalate metabolites among infertile women and associations with in vitro fertilization  
312 parameters. *Reprod Toxicol* 61: 142-50.
- 313 Euling SY, White LD, Kim AS, et al. (2013) Use of genomic data in risk assessment case  
314 study: II. Evaluation of the dibutyl phthalate toxicogenomic data set. *Toxicol Appl*  
315 *Pharmacol* 271: 349-62.
- 316 Guo Y, Wu Q, Kannan K. (2011) Phthalate metabolites in urine from China, and implications  
317 for human exposures. *Environ Int*; 37: 893-898.
- 318 Hines C, Hopf N, Deddens J, Silva M, Calafat A. (2011) Estimated daily intake of phthalates  
319 in occupationally exposed groups. *J Expo Sci Environ Epidemiol* 21 :133-41.
- 320 Hu Y, Yuan D, Wu Y, et al. (2018) Bisphenol A initiates excessive premature activation of  
321 primordial follicles in mouse ovaries via the PTEN signaling pathway. *Reprod Sci*  
322 25:609-620.
- 323 Li A, Qiu M, Zhou H, Wang T, Guo W. Share. (2017) PTEN, Insulin Resistance and Cancer.  
324 *Curr Pharm Des* 23:3667-3676.
- 325 Li H, Li J, Qu Z, et al. (2020) Intrauterine exposure to low-dose DBP in the mice induces  
326 obesity in offspring via suppression of UCP1 mediated ER stress. *Sci Rep* 10:16360.
- 327 Li L, Wang F, Zhang J, Wang K, De X, Li L, Zhang Y. (2021) Typical phthalic acid esters

328 induce apoptosis by regulating the PI3K/Akt/Bcl-2 signaling pathway in rat insulinoma  
329 cells. *Ecotoxicol Environ Saf* 208: 111461.

330 Majeed KA, Ur Rehman H, Yousaf MS, et al. (2017) Sub-chronic exposure to low  
331 concentration of dibutyl phthalate affects anthropometric parameters and markers of  
332 obesity in rats. *Environ Sci Pollut Res Int* 24: 25462-25467.

333 Manikkam M, Tracey R, Guerrero-Bosagna C, Skinner MK. (2013) Plastics derived  
334 endocrine disruptors (BPA, DEHP and DBP) induce epigenetic transgenerational  
335 inheritance of obesity, reproductive disease and sperm epimutations. *PLoS One* 8: e55387.

336 Neier K, Cheatham D, Bedrosian LD, Gregg BE, Song PXX, Dolinoy DC. (2019)  
337 Longitudinal Metabolic Impacts of Perinatal Exposure to Phthalates and Phthalate Mixtures  
338 in Mice. *Endocrinology* 160:1613-1630.

339 Neier K, Montrose L, Chen K, et al. (2020) Short- and long-term effects of perinatal phthalate  
340 exposures on metabolic pathways in the mouse liver. *Environ Epigenet* 6: dvaa017.

341 Radke EG, Galizia A, Thayer KA, Cooper GS. (2019) Phthalate exposure and metabolic  
342 effects: a systematic review of the human epidemiological evidence. *Environ Int* 132:  
343 104768.

344 So A, Sakaguchi K, Okada Y, et al. (2020) Relation between HOMA-IR and insulin  
345 sensitivity index determined by hyperinsulinemic-euglycemic clamp analysis during  
346 treatment with a sodium-glucose cotransporter 2 inhibitor. *Endocr J.* 2020;67:501-507.

347 Wang H, Wang J, Zhang J, Jin S, Li H. (2017) Role of PI3K/AKT/mTOR signaling pathway  
348 in DBP-induced apoptosis of testicular sertoli cells in vitro. *Environ Toxicol Pharmacol*  
349 53:145-150.

350 Williams MJ, Wiemerslage L, Gohel P, Kheder S, Kothegeala LV, Schiöth HB. (2016) Dibutyl  
351 phthalate exposure disrupts evolutionarily conserved insulin and glucagon-like signaling in  
352 drosophila males. *Endocrinology* 157: 2309-21.

353 Xiong Z, Zeng Y, Zhou J, Shu R, Xie X, Fu Z. (2020) Exposure to dibutyl phthalate impairs  
354 lipid metabolism and causes inflammation via disturbing microbiota-related gut-liver axis.  
355 *Acta Biochim Biophys Sin (Shanghai)*. 2020;52(12):1382-1393.

356

357

358 **Figure Legends**

359 **Fig 1** The serum levels of glucolipid in female offspring after the perinatal exposure to  
360 dibutyl phthalate (\*P<0.05 and \*\*P<0.01 in post hoc comparisons)

361 **Fig 2** The levels of proteins in glucolipid metabolism expressed in muscle of female offspring  
362 after maternal perinatal exposure. Columns show the result of densitometric analysis, which is  
363 corrected and normalized by  $\beta$ -actin.

364 **Fig 3** The levels of proteins in glucolipid metabolism expressed in muscle of female offspring  
365 evaluated by western blot.

**Table 1. The weight of F0 rats among groups during pregnant and lactation period**

| Days  | Negative control<br>(n=8) | Low DBP<br>(n=9) | Medium DBP<br>(n=9) | High DPB<br>(n=7) | <i>P</i> |
|-------|---------------------------|------------------|---------------------|-------------------|----------|
| GD0   | 244.3±4.80                | 242.1±1.54       | 243.8±1.72          | 243.1±3.72        | 0.53     |
| GD7   | 265.9±8.86                | 260.2±2.77       | 263.7±1.58          | 261.6±5.88        | 0.17     |
| GD14  | 290.13±9.65               | 279.0±3.81       | 284.8±2.90          | 278.4±5.88        | < 0.001  |
| GD21  | 317.1±12.56               | 298.3±7.23       | 299.0±5.43          | 293.6±6.08        | < 0.001  |
| PND0  | 289.6±5.60                | 284.3±3.20       | 282.2±3.15          | 281.4±3.73        | < 0.001  |
| PND7  | 293.1±4.87                | 292.6±6.06       | 285.1±3.14          | 280.8±3.13        | < 0.001  |
| PND14 | 291.1±4.12                | 287.1±4.86       | 280.0±3.81          | 274.4±3.21        | < 0.001  |
| PND21 | 283.4±7.27                | 278.3±4.36       | 274.1±4.19          | 271.3±1.98        | < 0.001  |

DBP, dibutyl phthalate; GD, gestational day; PND, post-natal day; SD, standard deviation

bioRxiv preprint doi: <https://doi.org/10.1101/2021.07.27.454002>; this version posted July 27, 2021. The copyright holder for this preprint (which was not certified by peer review) is the author/funder, who has granted bioRxiv a license to display the preprint in perpetuity. It is made available under aCC-BY 4.0 International license.

**Table 2. The weights of F1 rats among groups**

| Days  | Negative control<br>(n=30) | Low DBP<br>(n=38) | Medium DBP<br>(n=37) | High DBP<br>(n=30) | <i>P</i> |
|-------|----------------------------|-------------------|----------------------|--------------------|----------|
| PND0  | 8.1±1.44                   | 8.3±1.06          | 8.3±1.03             | 8.2±1.01           | 0.77     |
| PND7  | 14.1±1.67                  | 14.9±1.69         | 15.8±1.16            | 15.6±1.27          | < 0.001  |
| PND14 | 22.5±2.55                  | 22.8±2.31         | 23.6±2.28            | 23.7±1.84          | 0.08     |
| PND21 | 36.6±5.26                  | 40.4±4.86         | 41.8±4.93            | 42.9±6.26          | < 0.001  |
| PND28 | 53.2±11.10                 | 54.3±9.30         | 60.0±10.28           | 61.4±11.21         | < 0.001  |
| M 2   | 105.9±12.70                | 123.7±12.78       | 133.5±15.11          | 136.4±11.43        | < 0.001  |
| M 3   | 166.8±2.73                 | 172.6±4.27        | 174.1±7.50           | 178.8±4.26         | < 0.001  |

DBP, dibutyl phthalate; M, month; PND, post-natal day; SD, standard deviation

bioRxiv preprint doi: <https://doi.org/10.1101/2021.07.27.454002>; this version posted July 27, 2021. The copyright holder for this preprint (which was not certified by peer review) is the author/funder, who has granted bioRxiv a license to display the preprint in perpetuity. It is made available under aCC-BY 4.0 International license.

**Table 3. The visceral fat of F1 female rats in different age among groups**

|                             | Age (month) | Control   | Low DBP    | Medium DBP | High DBP   | <i>P</i> |
|-----------------------------|-------------|-----------|------------|------------|------------|----------|
| Weight of visceral fat (g)  | 1           | 2.02±0.68 | 2.03±0.45  | 2.62±0.44* | 2.58±0.48  | 0.03     |
|                             | 2           | 3.86±0.33 | 4.83±0.80* | 5.59±0.86* | 5.98±0.65* | 0.001    |
|                             | 3           | 6.07±0.56 | 6.90±0.67* | 7.86±0.77* | 7.94±0.56* | 0.001    |
| Visceral fat percentage (%) | 1           | 3.74±0.38 | 4.01±0.34  | 4.23±0.35* | 4.04±0.39  | 0.09     |
|                             | 2           | 3.77±0.33 | 3.86±0.32  | 4.32±0.45* | 4.33±0.38* | 0.05     |
|                             | 3           | 3.63±0.35 | 3.98±0.33  | 4.49±0.43* | 4.41±0.31* | 0.001    |

\**P* <0.05 as compared with control group; visceral fat percentage was calculated by dividing visceral fat weight by body weight.

bioRxiv preprint doi: <https://doi.org/10.1101/2021.07.27.454002>; this version posted July 27, 2021. The copyright holder for this preprint (which was not certified by peer review) is the author/funder, who has granted bioRxiv a license to display the preprint in perpetuity. It is made available under aCC-BY 4.0 International license.

DBP, dibutyl phthalate



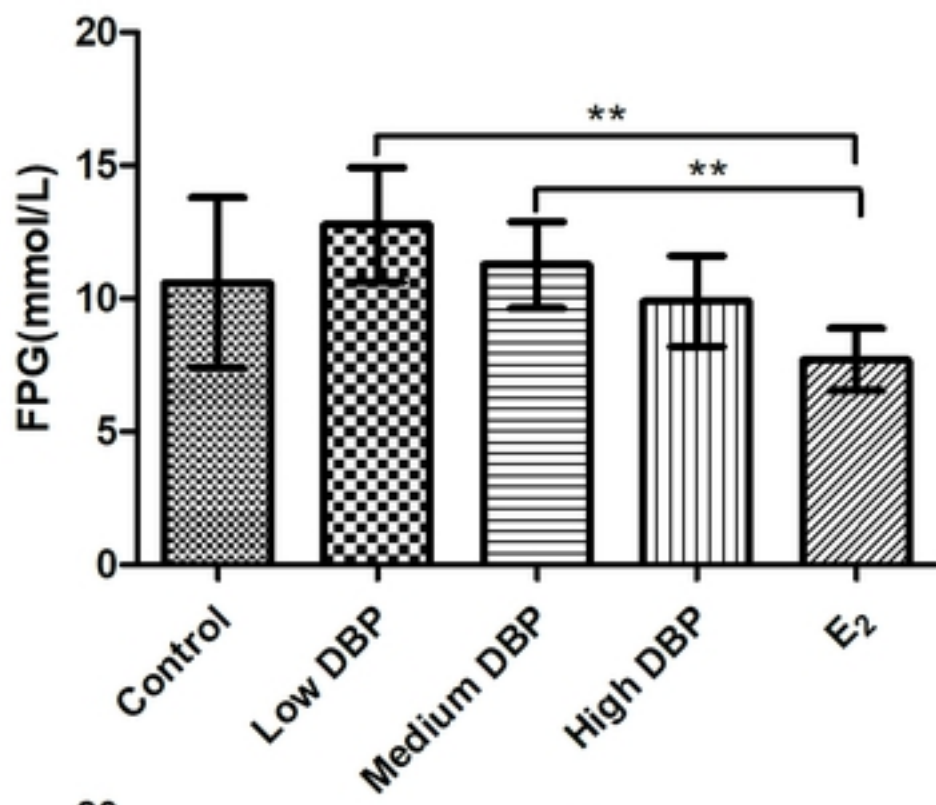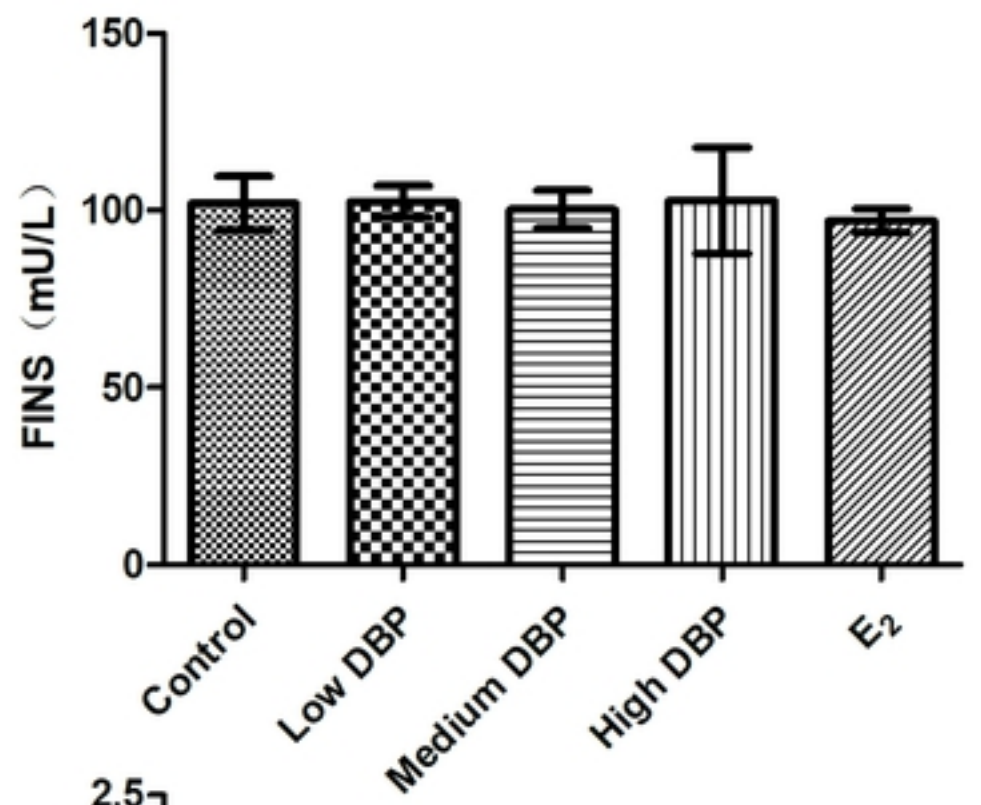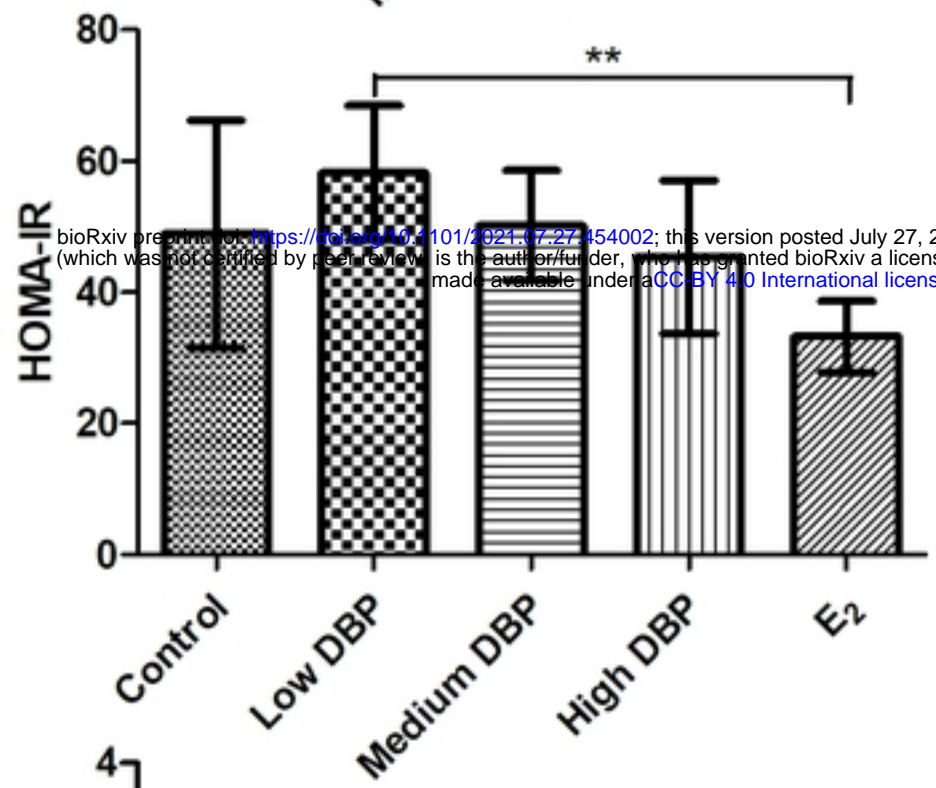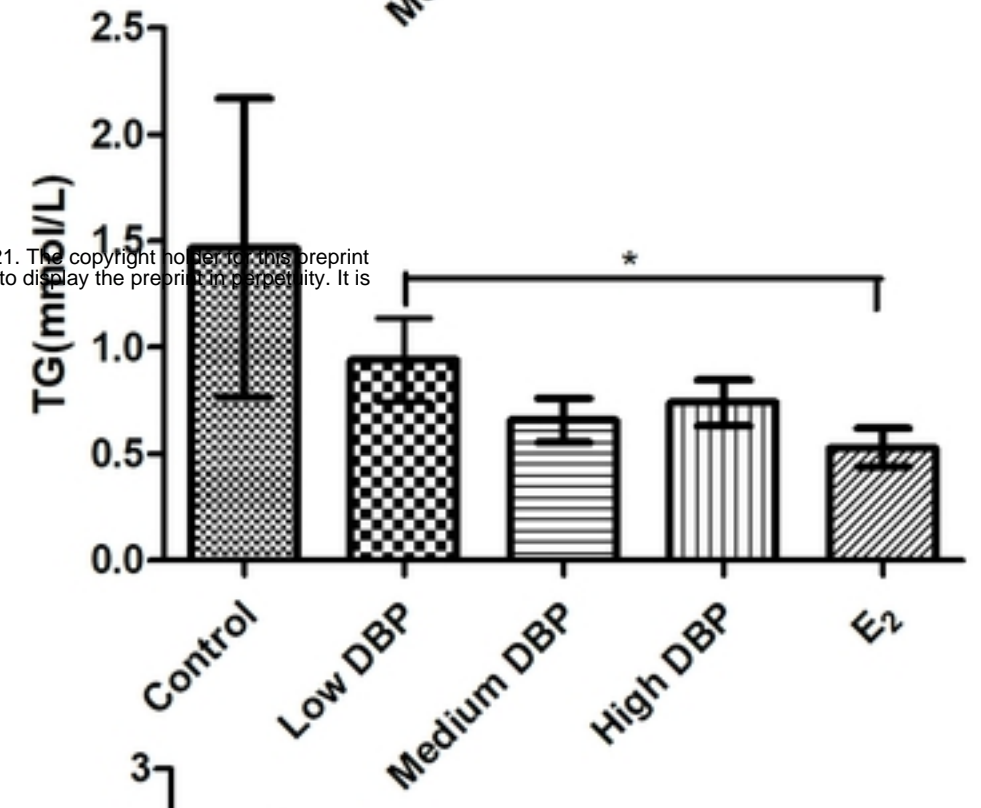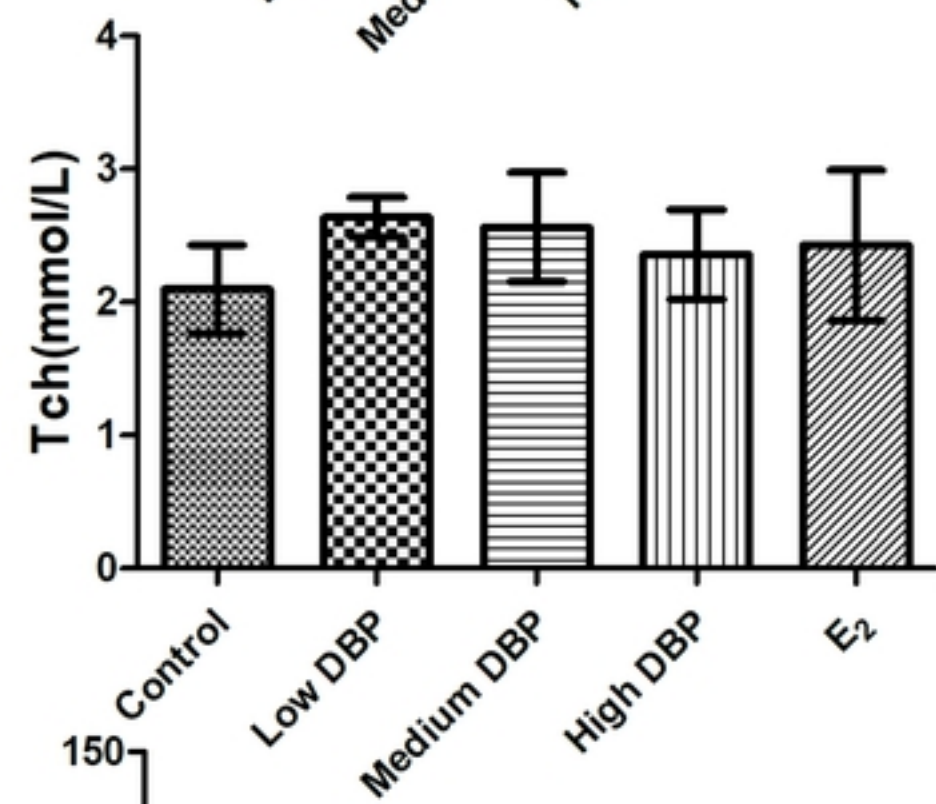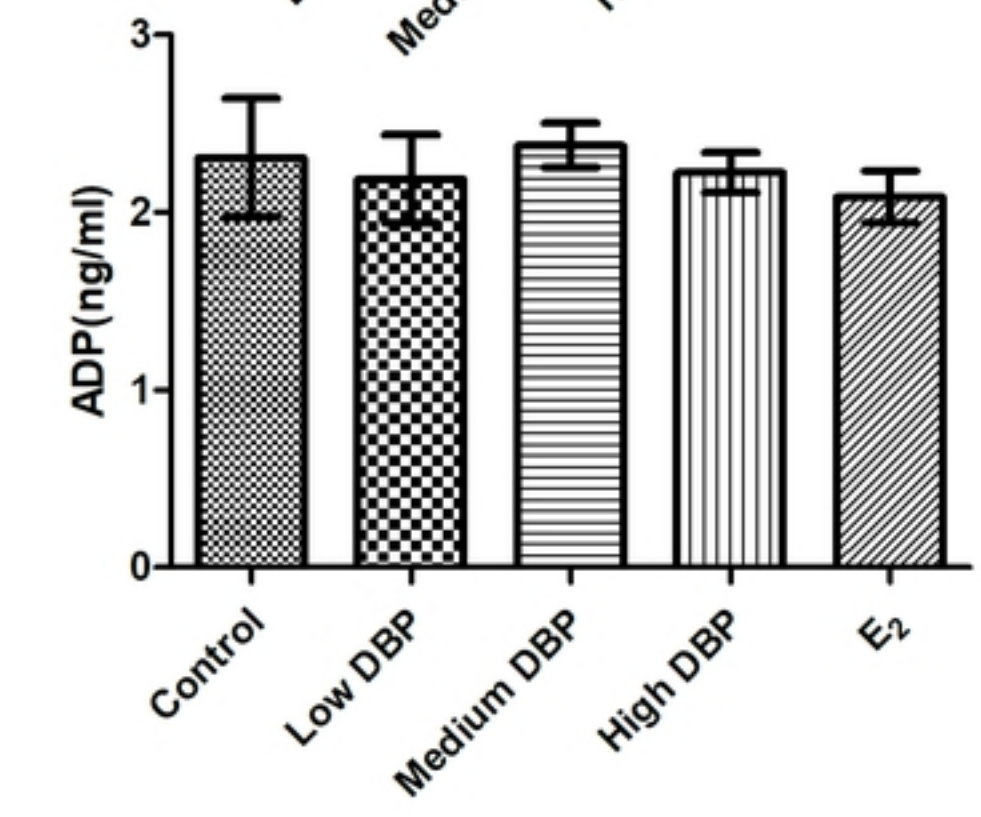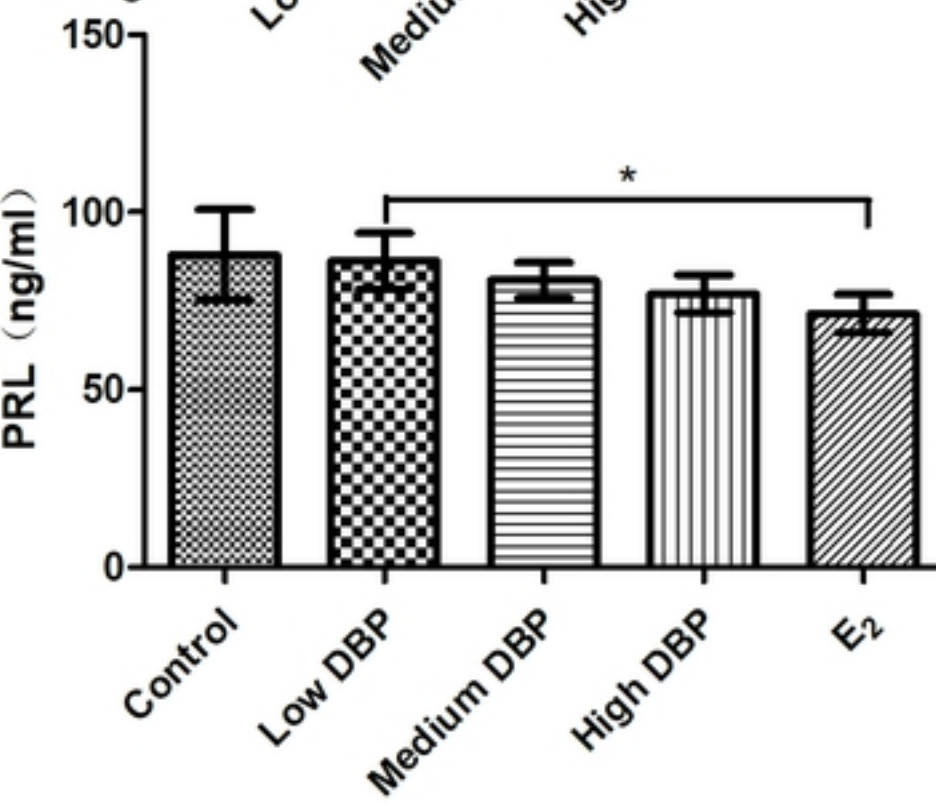

Figure 1

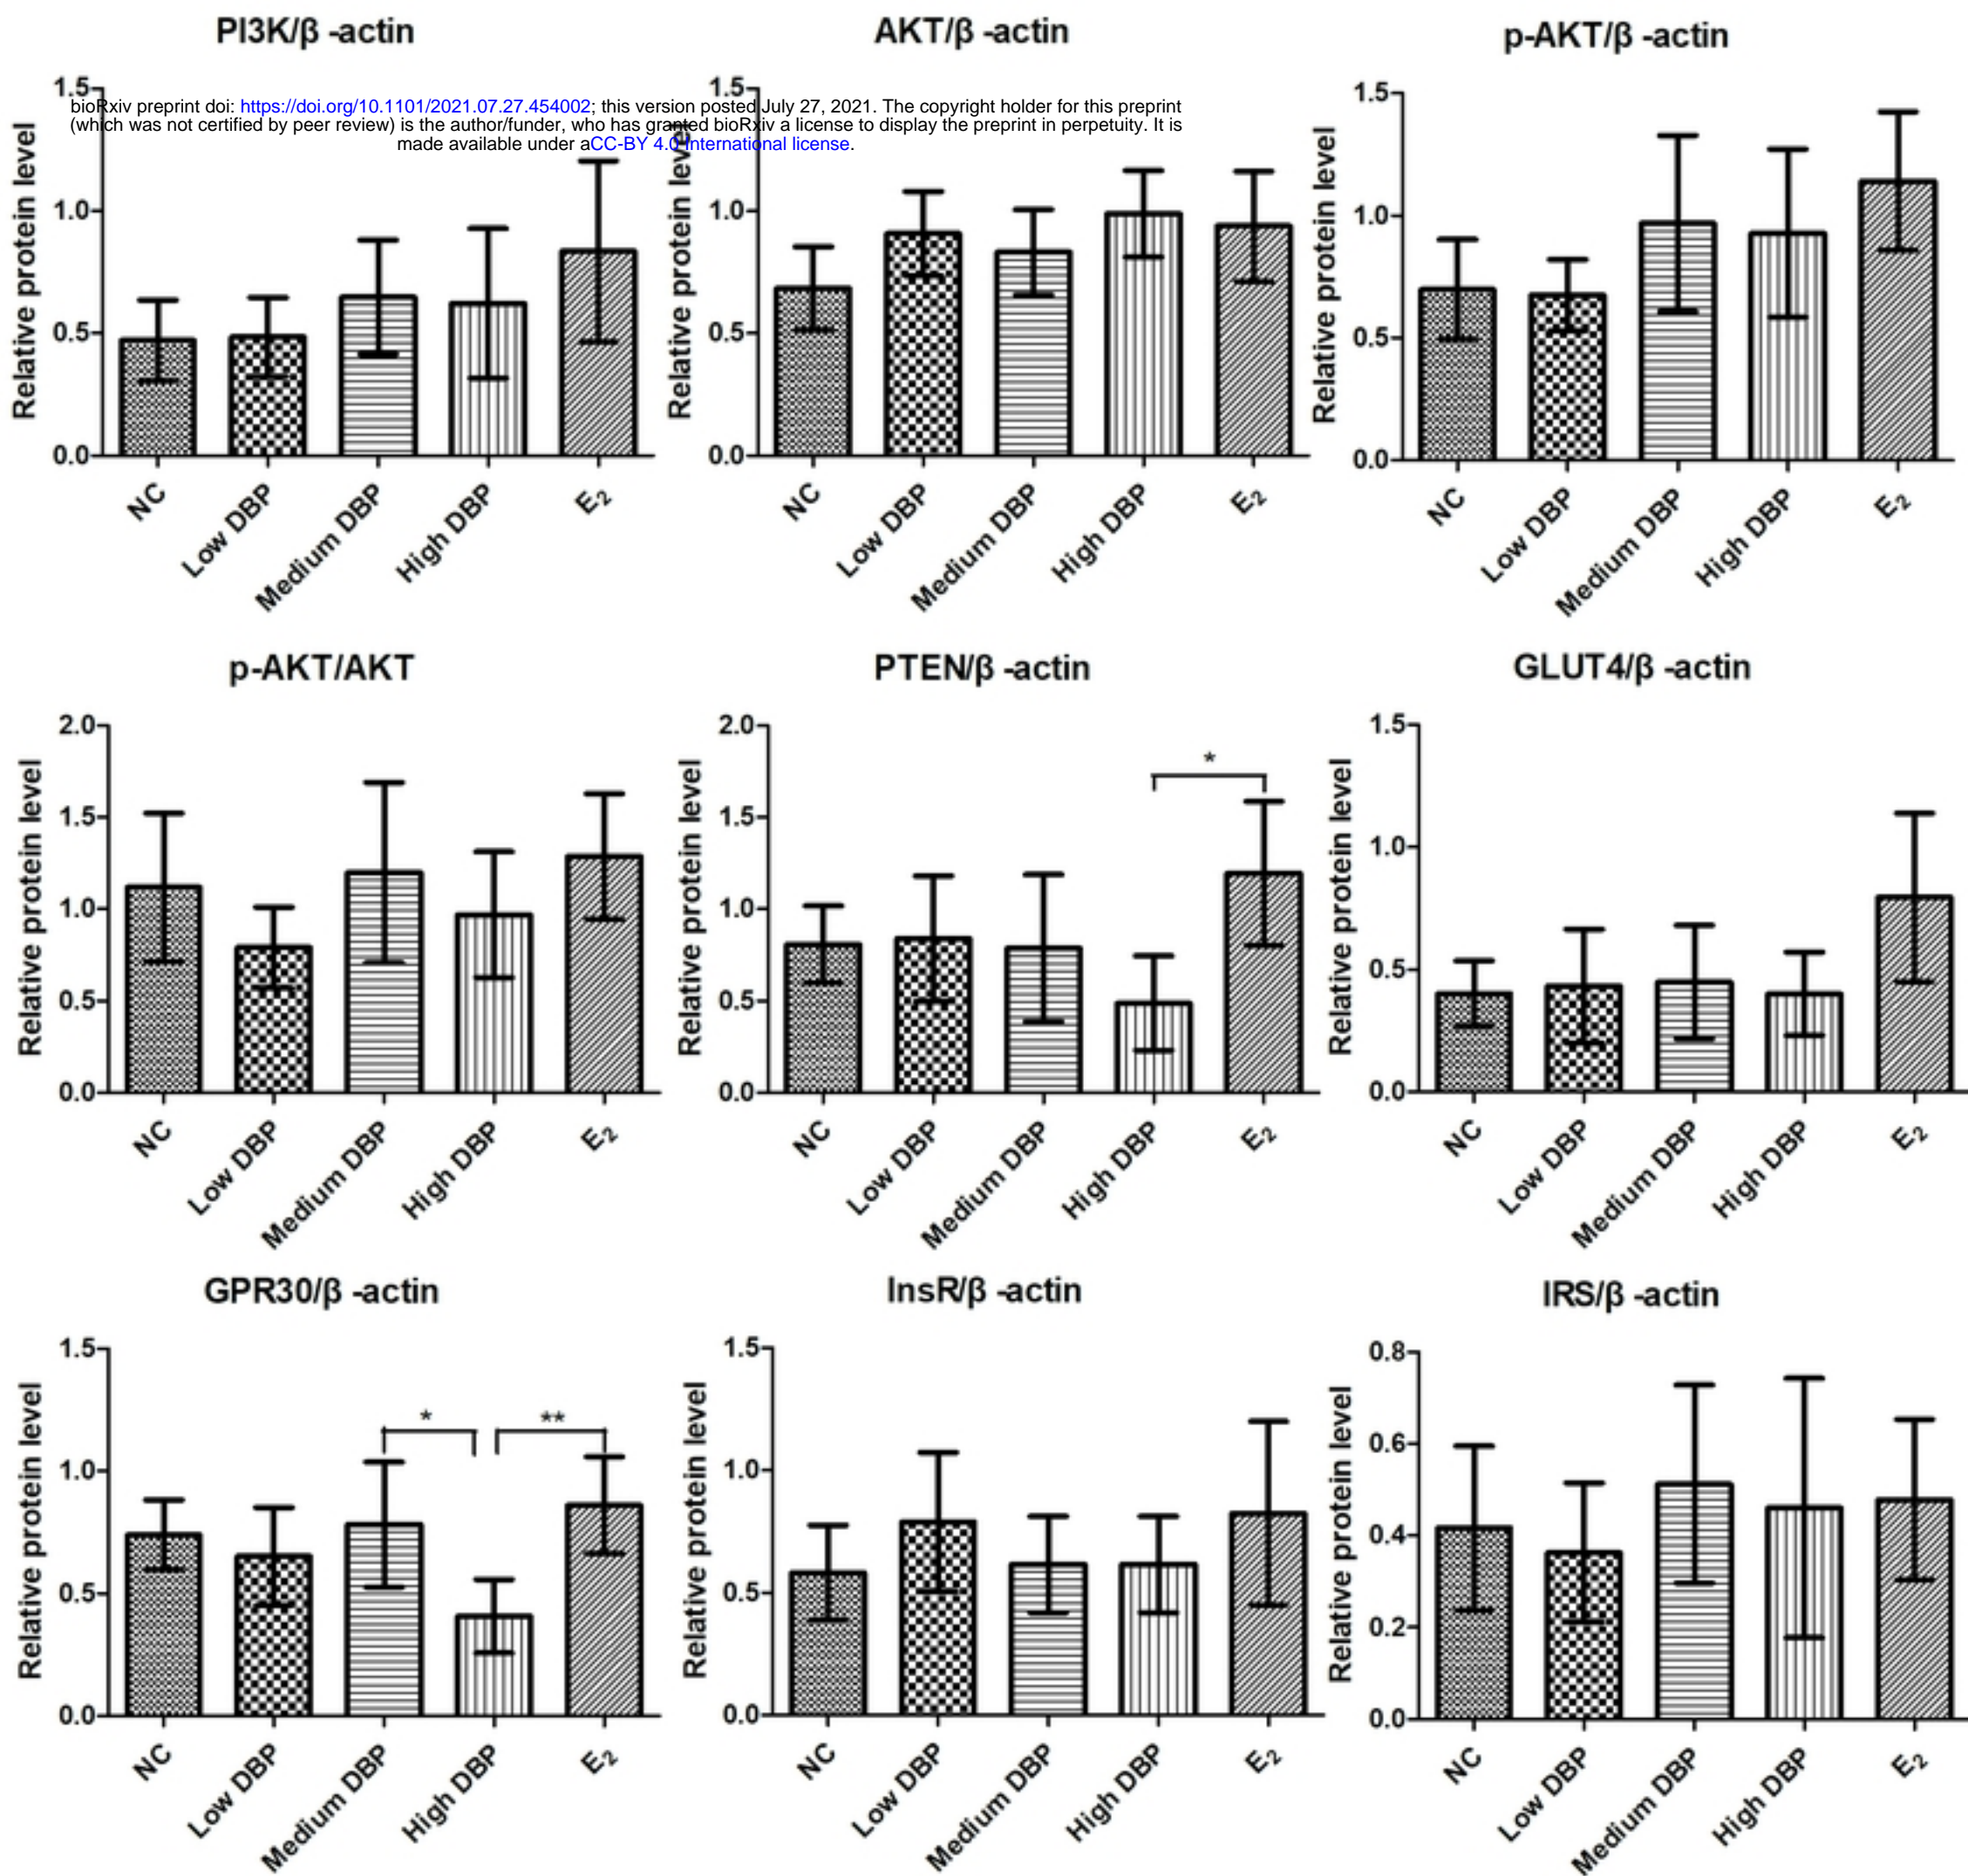

Figure 2

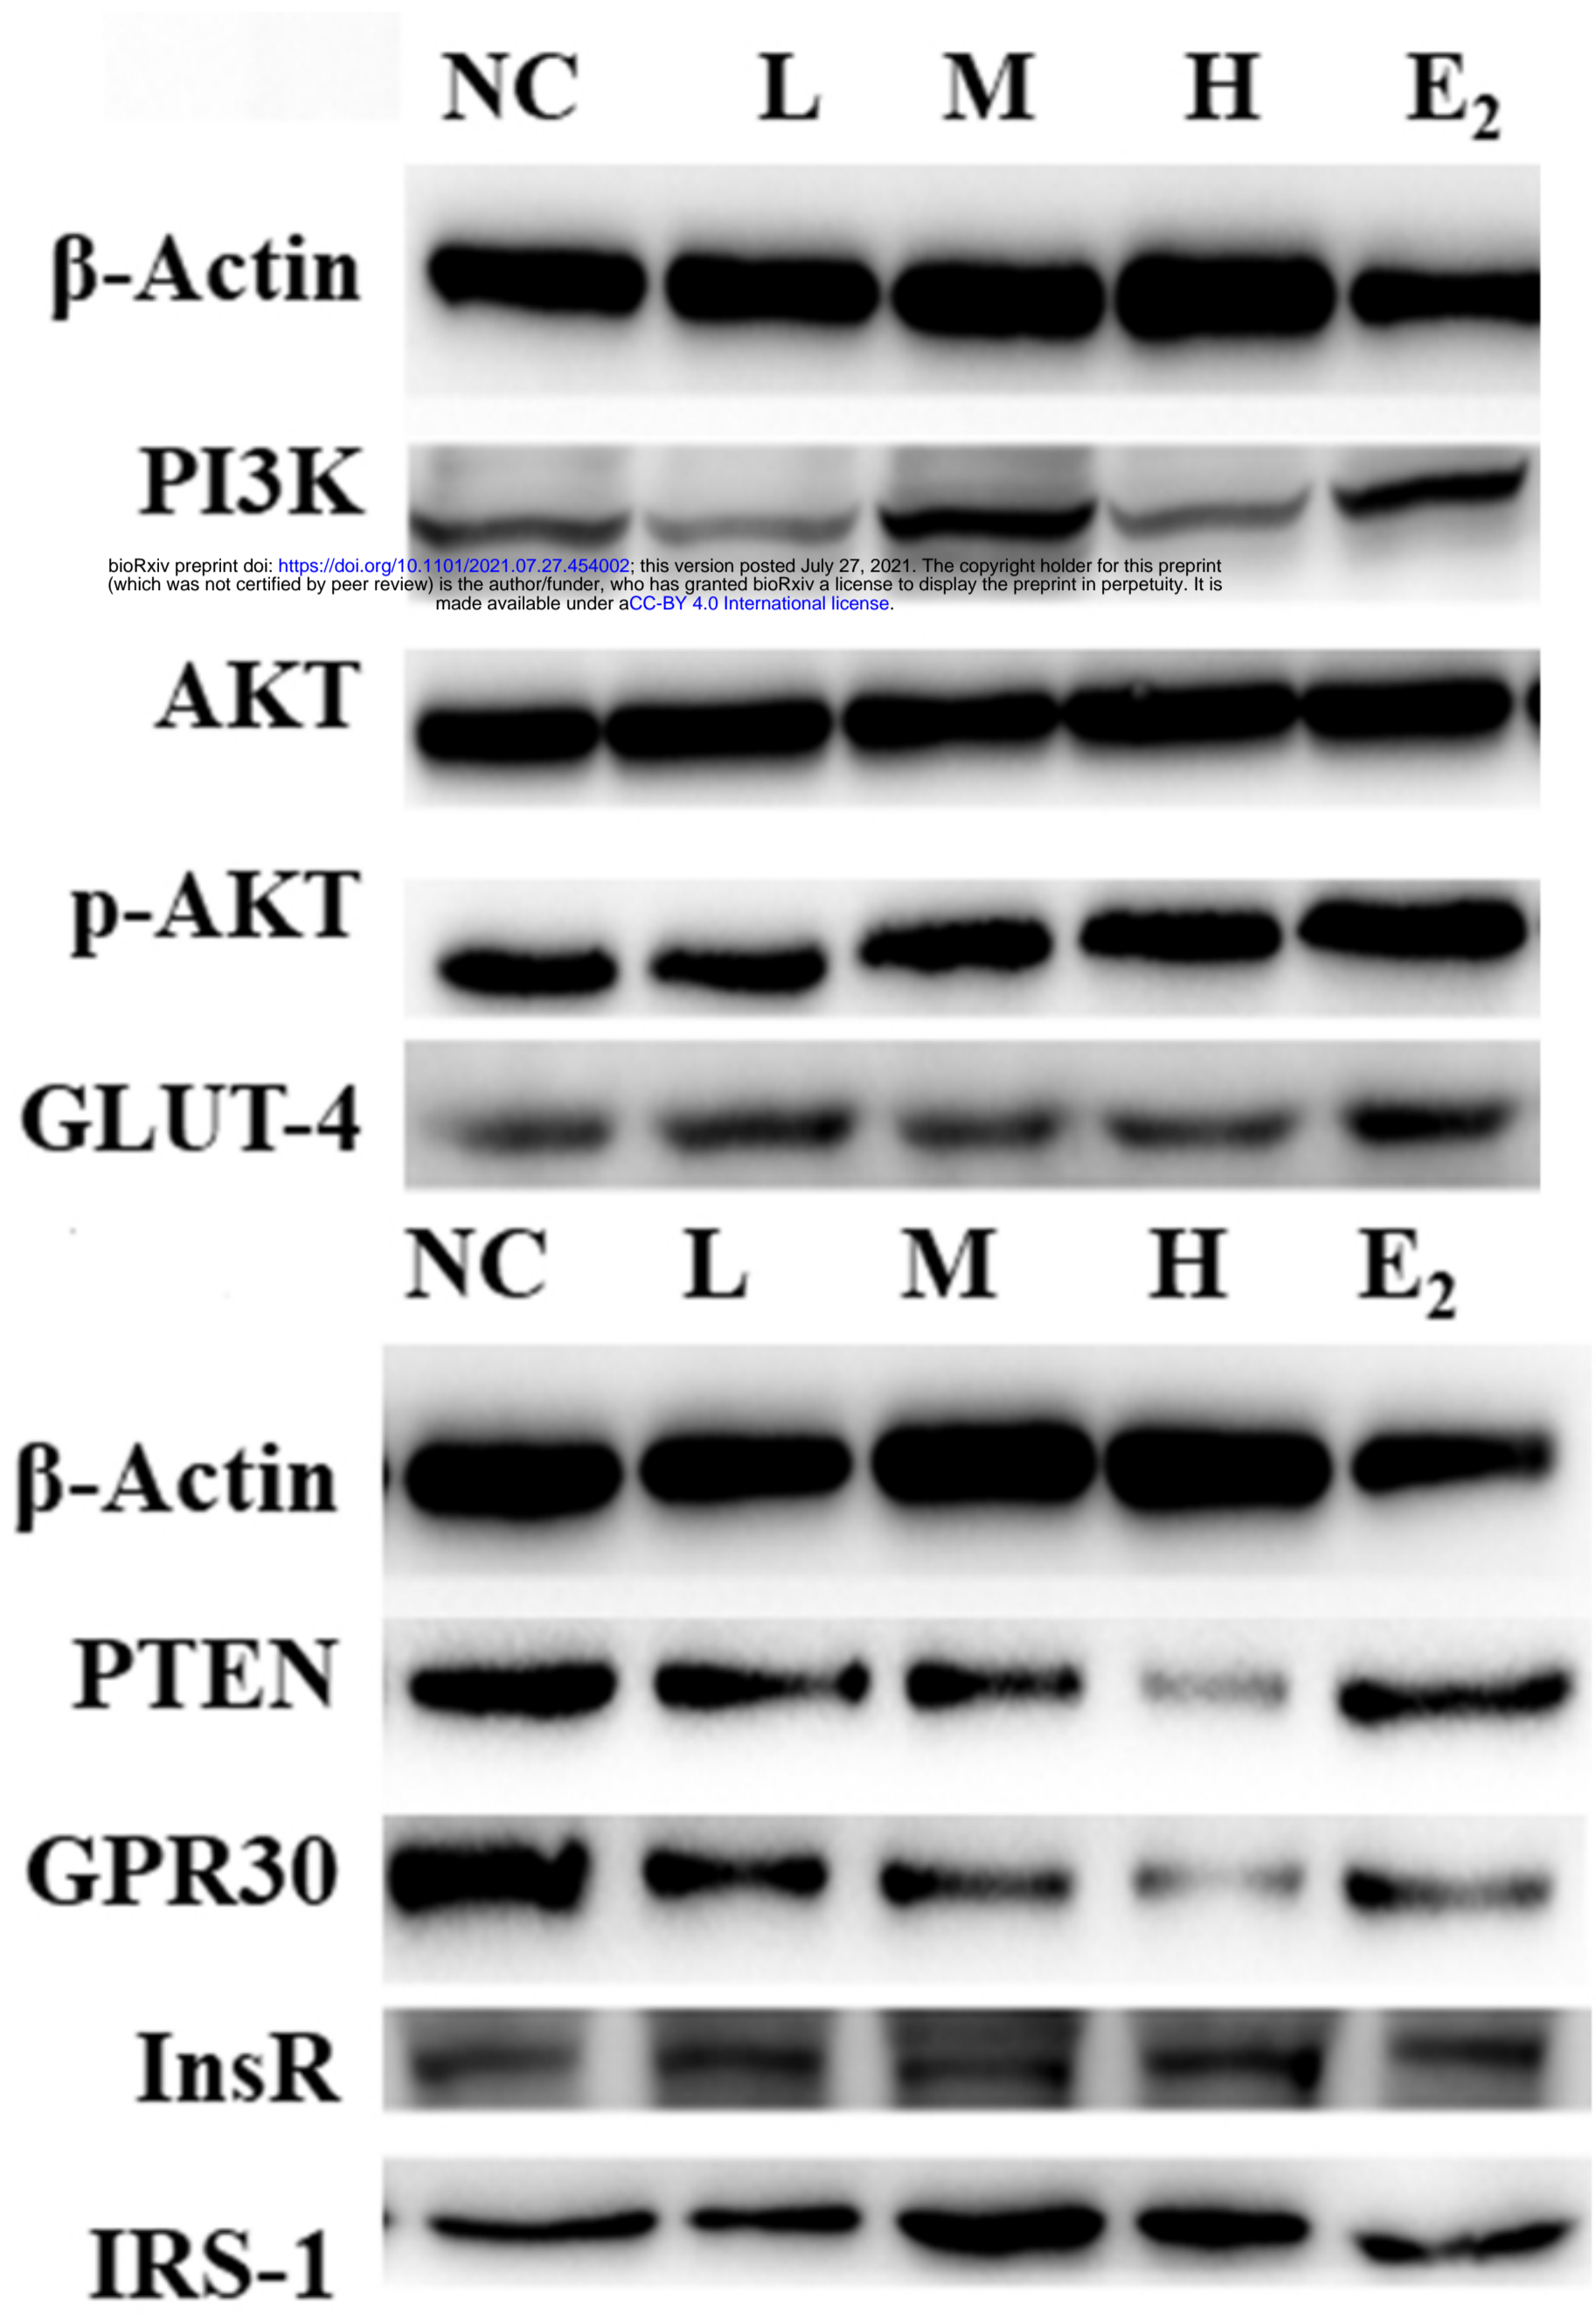

bioRxiv preprint doi: <https://doi.org/10.1101/2021.07.27.454002>; this version posted July 27, 2021. The copyright holder for this preprint (which was not certified by peer review) is the author/funder, who has granted bioRxiv a license to display the preprint in perpetuity. It is made available under aCC-BY 4.0 International license.

Figure 3
